# Supplementary material for: CRISPR‐mediated knockout of VEGFR2/KDR inhibits cell growth in a squamous thyroid cancer cell line
Source: PubMed Central journal article supplement (PMC9063427; doi:10.1002/2211-5463.13399), 2022-04-08

Supplementary figure 1

Western blot membranes of Figure 2K

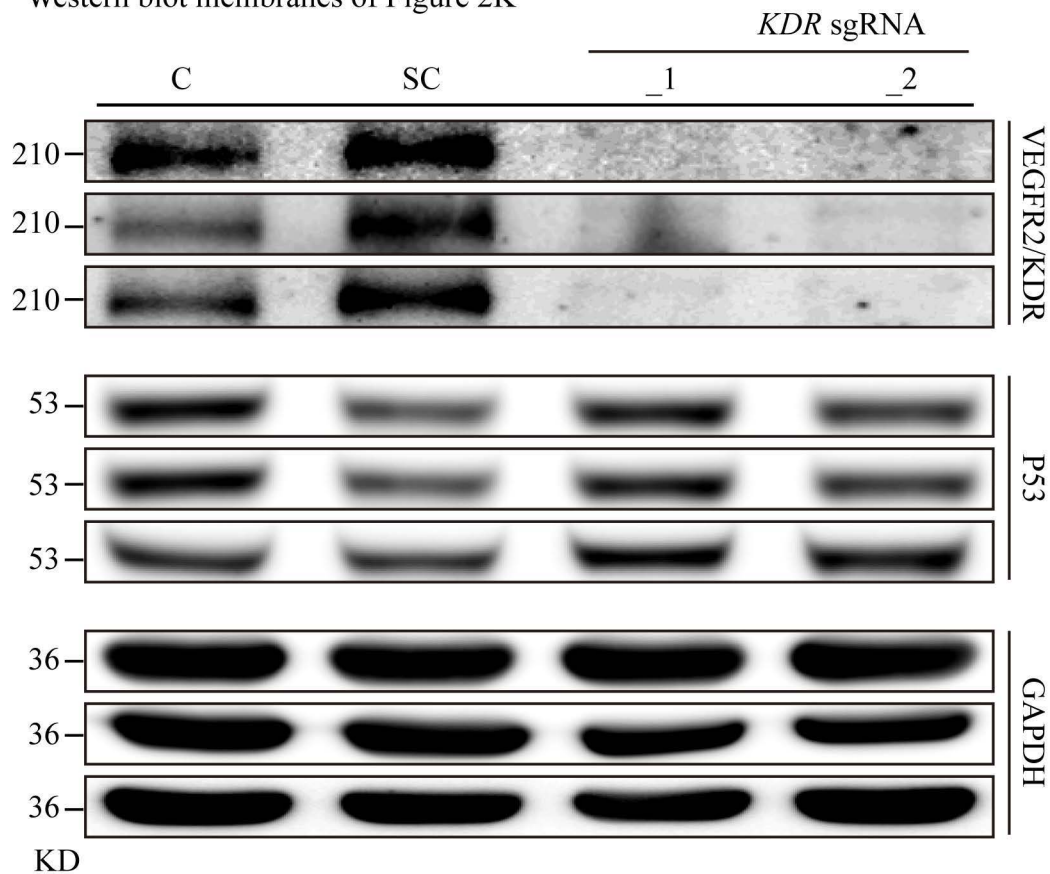

A Crystal violet stain image of Figure 3B

SC

KDR sgRNA\_2

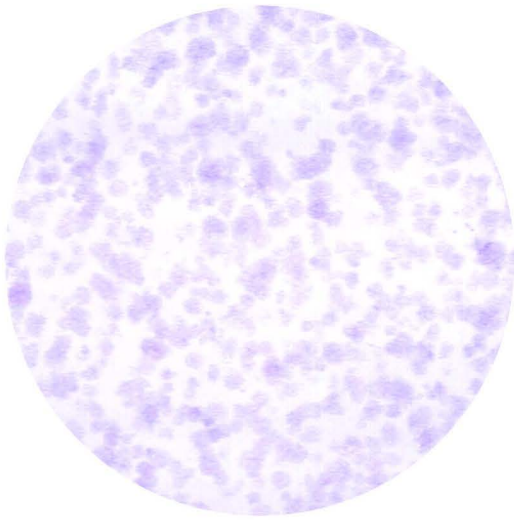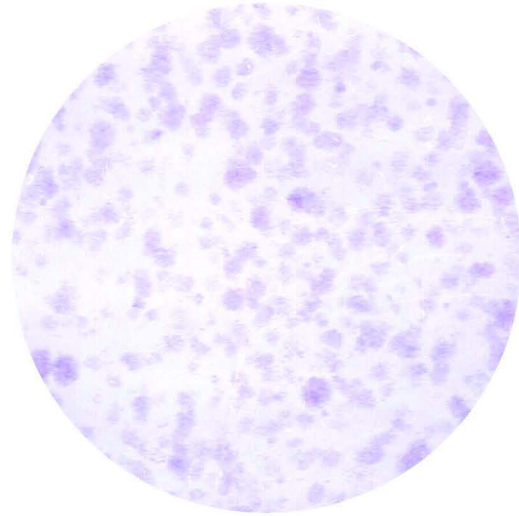

B Microscopy image of Figure 3C

SC

KDR sgRNA\_2

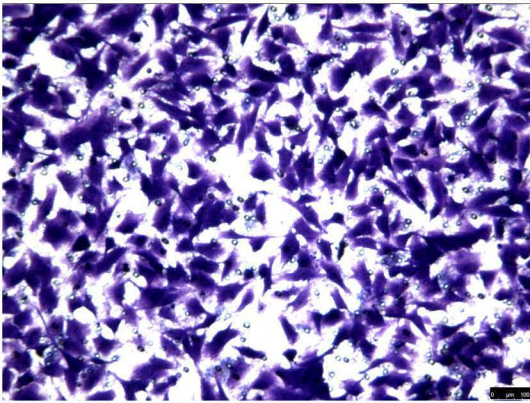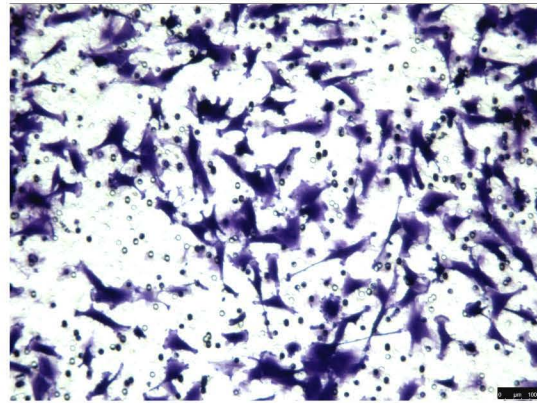

C Western blot membrane of Figure 3E

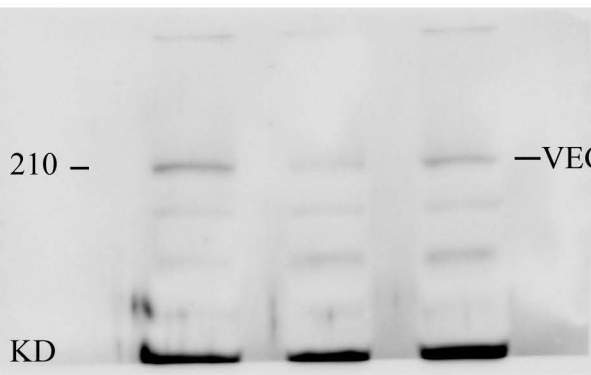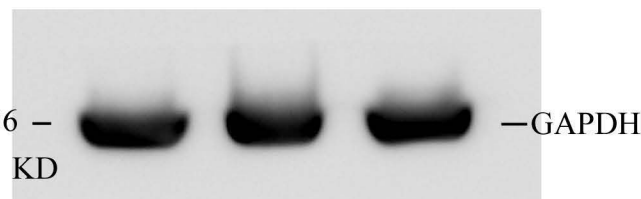

Original microscopy image of Figure 5A

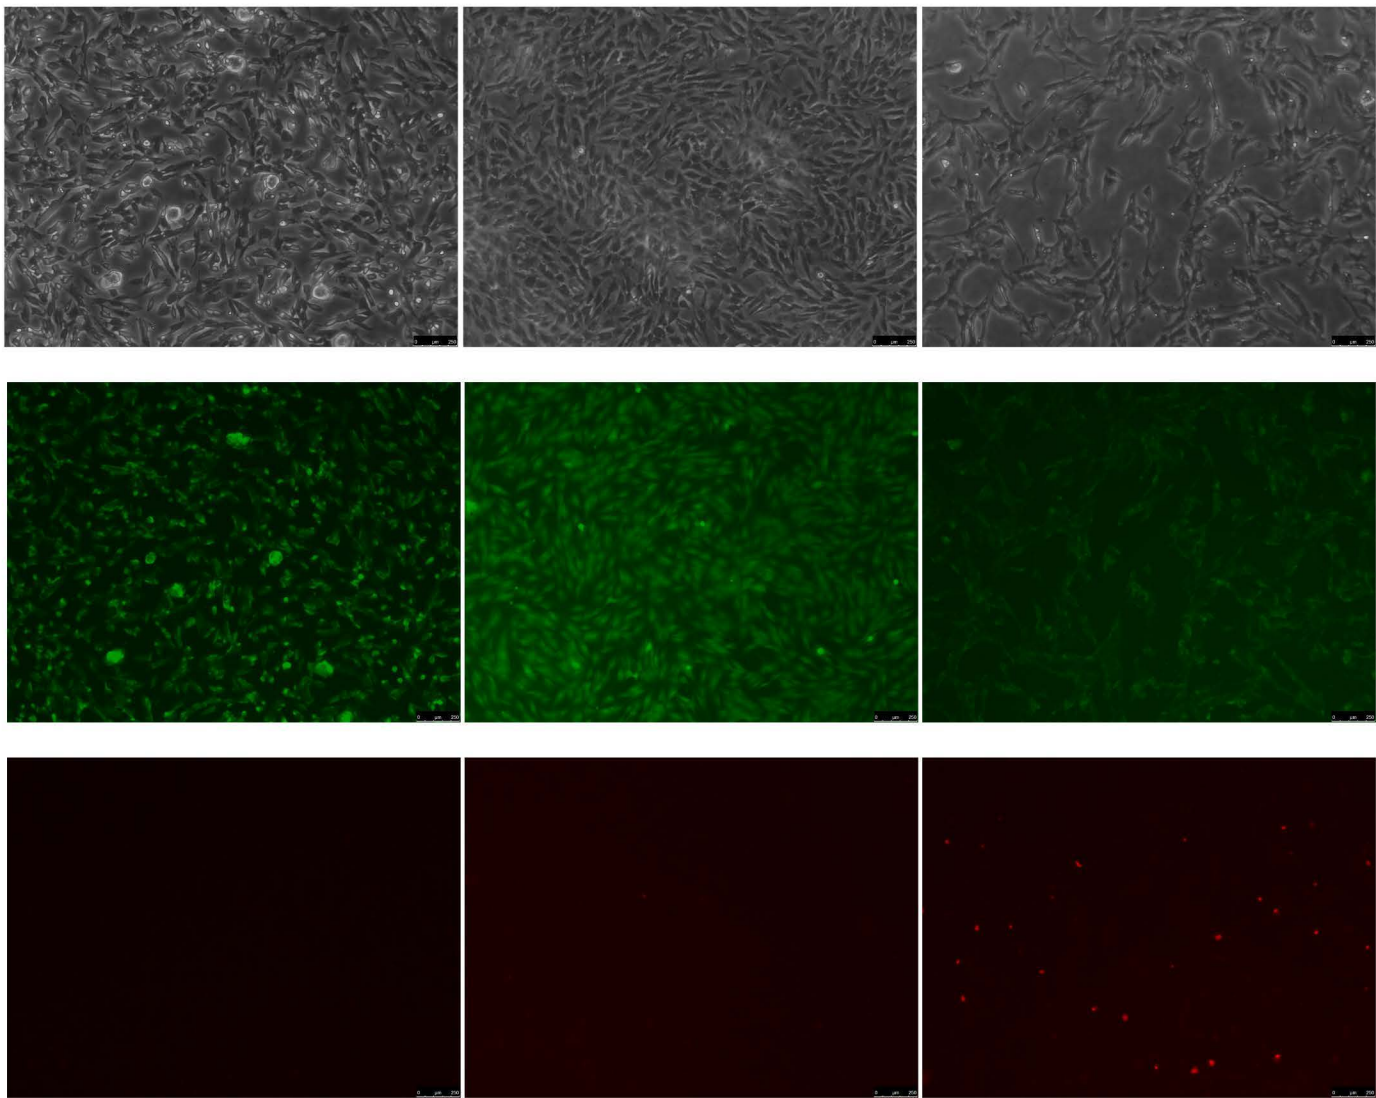

Western blot membranes of Figure 5C

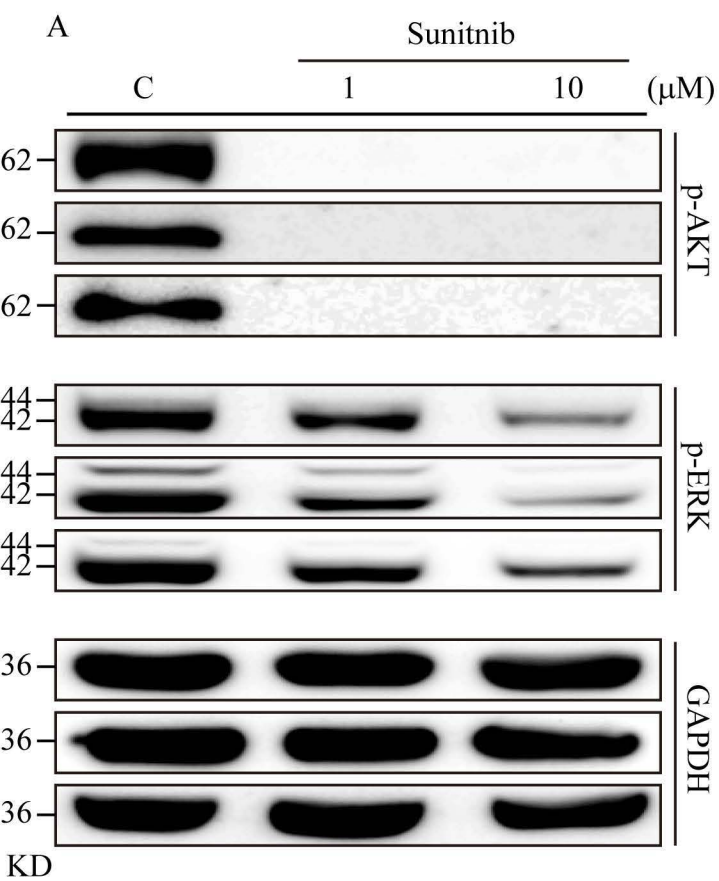

Western blot membranes of Figure 5D

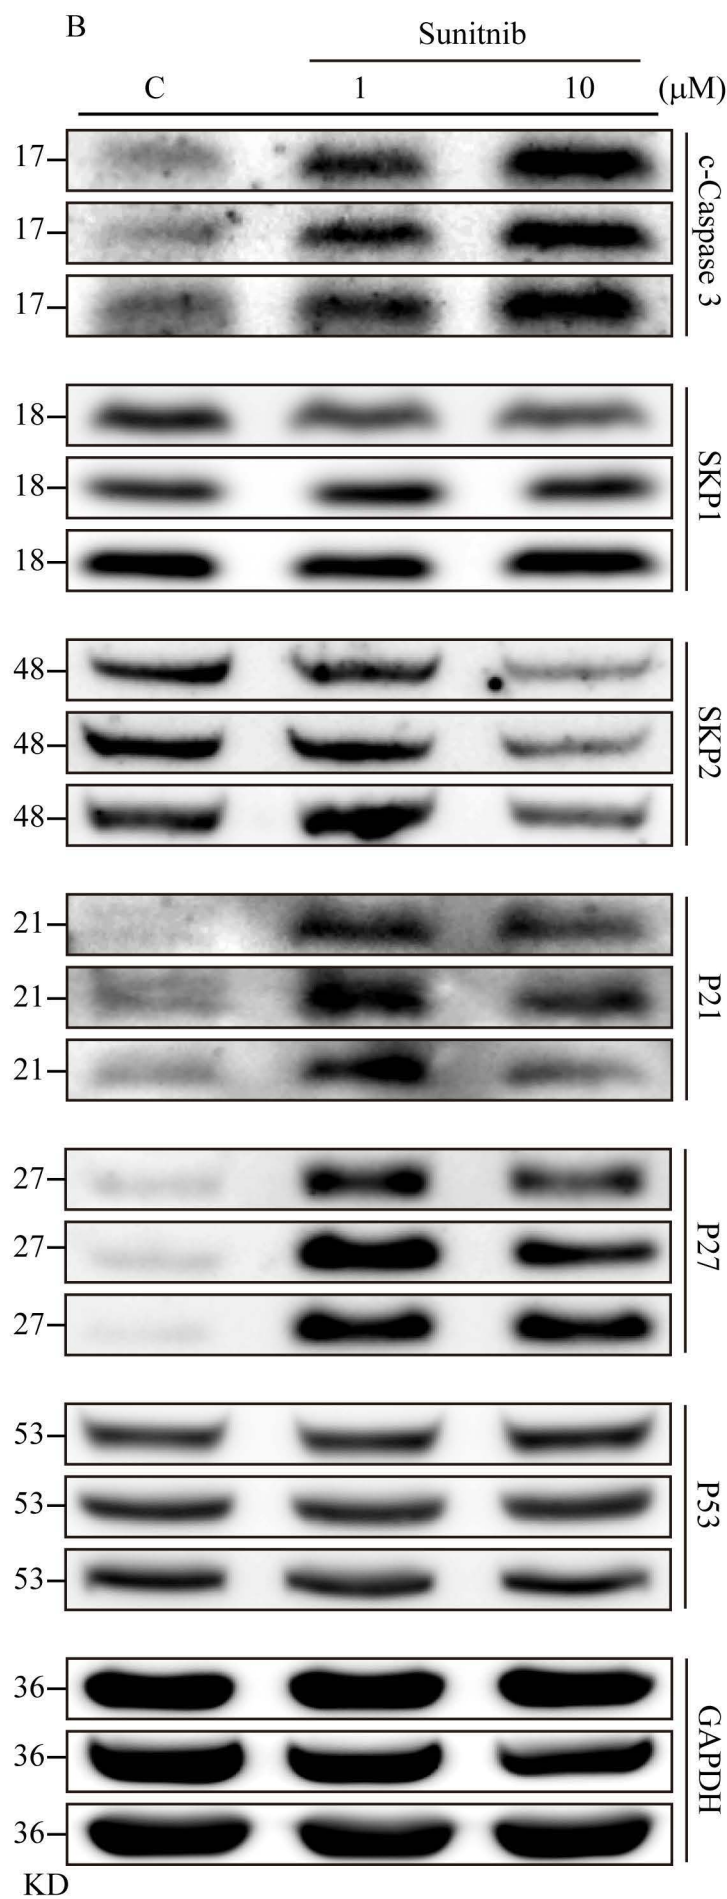

Supplement: FEB4-12-993-s001.pdf [file FEB4-12-993-s001.pdf]
